# Supplementary material for: Surveying mutation density patterns around specific genomic features
Source: PubMed Central journal article supplement — Genome Res. 2022 Oct;32(10):1930–40. doi: 10.1101/gr.276770.122 (PMC9712630; doi:10.1101/gr.276770.122), 2022-10
Supplement: supp_gr.276770.122_Supplemental_Figures_and_Tables.pdf [file supp_gr.276770.122_Supplemental_Figures_and_Tables.pdf]

# Surveying mutation density patterns around specific genomic features

(Supplemental Materials)

Contact: Yan Guo, yanguo1978@gmail.com

August 31<sup>st</sup>, 2022

## Contents

|                                                                                             |    |
|---------------------------------------------------------------------------------------------|----|
| Properties of an outdated replication origin dataset (Haradhvala et al. 2016).....          | 2  |
| Figure S1. Landscape of replication origins across 24 chromosomes.....                      | 2  |
| Figure S2. A/T/G/C content in vicinity of replication origins .....                         | 3  |
| MutDens application on enhancers in seven ICGC cohorts.....                                 | 4  |
| Supplemental Figure S3. Mutation density patterns around enhancers.....                     | 4  |
| Properties of mutation data in liver cancer cohorts.....                                    | 5  |
| Figure S4. Mutation burden statistics in two liver cancer cohorts. ....                     | 5  |
| Table S1. Population-specific liver cancer cohorts and mutation statistics .....            | 5  |
| Figure S5. Imbalance between C>A and G>T mutation forms in LICA-CN.....                     | 6  |
| Comparison of mutation density between RIP and Origin .....                                 | 6  |
| Figure S6. RIP shows higher mutation density than Origin in LMS-FR.....                     | 6  |
| Melanoma C>T transcriptional strand bias revealed in random subsets of samples.....         | 6  |
| Figure S7. Transcriptional strand bias was revealed in ten random MELA-AU patients .....    | 6  |
| Figure S8. Transcriptional strand bias was blurry in random single MELA-AU patients.....    | 8  |
| Runtime analysis of MutDens .....                                                           | 8  |
| Figure S9. MutDens computational time scales linearly with position/mutation quantity ..... | 8  |
| Option configuration file samples.....                                                      | 9  |
| Supplemental_Code_S6 (options_1reg.txt).....                                                | 9  |
| Supplemental_Code_S7 (options_2cht.txt).....                                                | 10 |
| Supplemental_Code_S8 (options_2reg.txt).....                                                | 10 |

## Additional, separate files

**Supplemental\_Code\_S1.txt** Primary R code

**Supplemental\_Code\_S2.txt** Secondary R code

**Supplemental\_Code\_S3.txt** Rmd file 1 (modality that entails input of one mutation file and one focal position set)

**Supplemental\_Code\_S4.txt** Rmd file 2 (MutDens can compare two sample cohorts on one set of focal positions)

**Supplemental\_Code\_S5.txt** Rmd file 3 (MutDens can compare two sets of focal positions for one sample cohort)

## Properties of an outdated replication origin dataset (Haradhvala et al. 2016)

Figure S1. Landscape of replication origins across 24 chromosomes

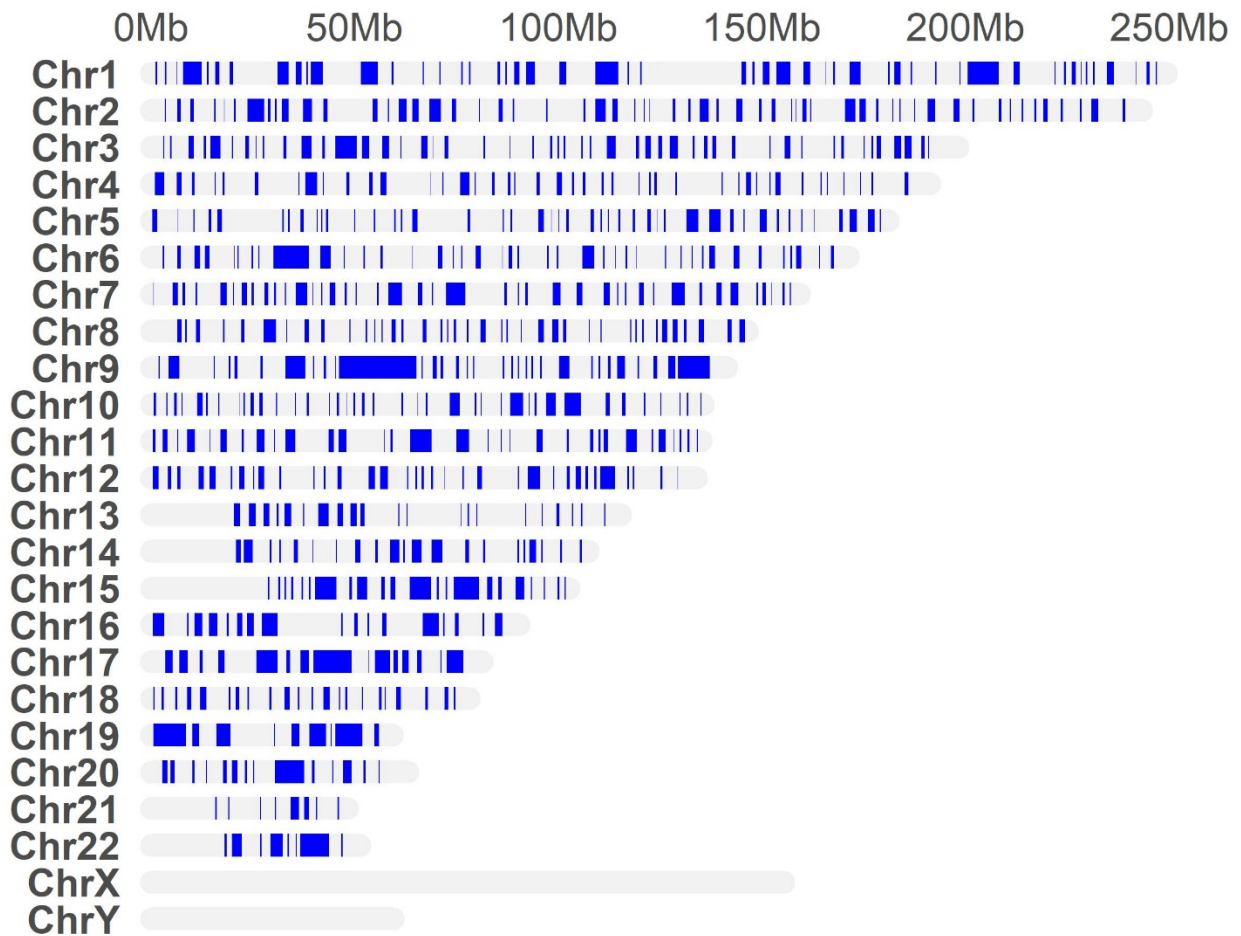

Figure S2. A/T/G/C content in vicinity of replication origins

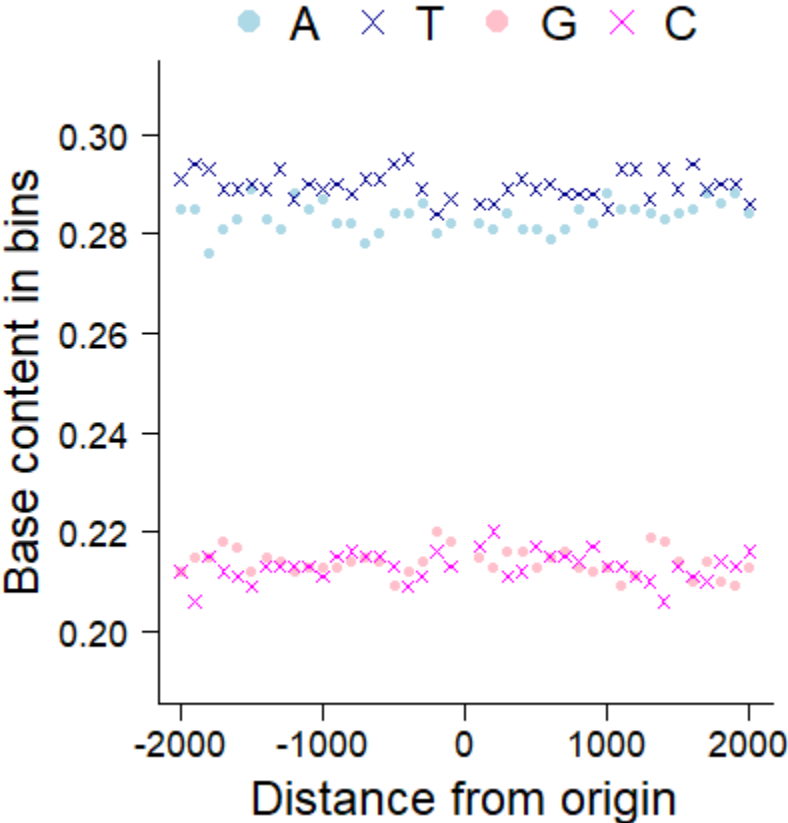

# MutDens application on enhancers in seven ICGC cohorts

## Supplemental Figure S3. Mutation density patterns around enhancers

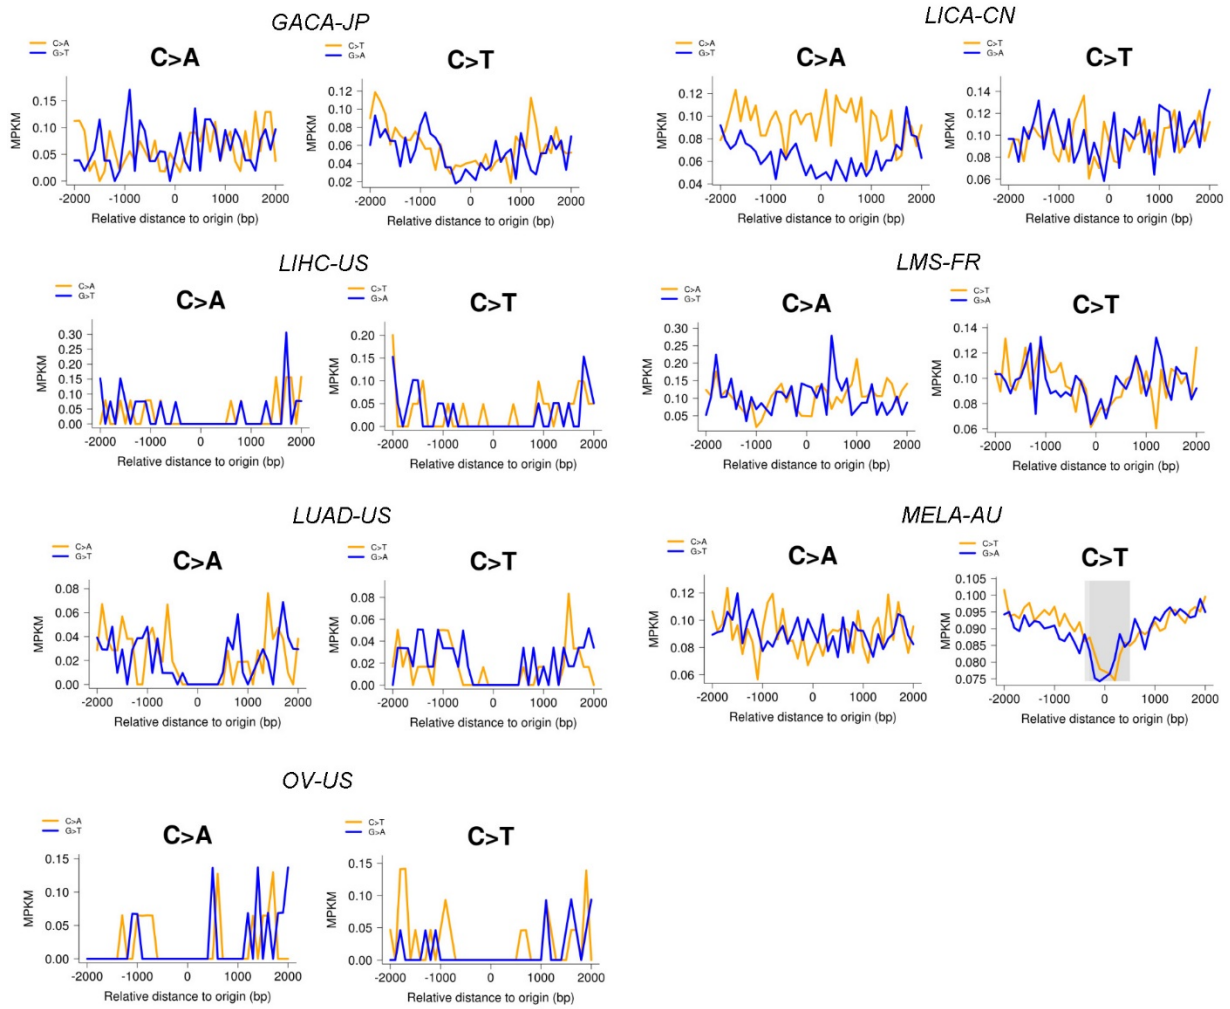

## Properties of mutation data in liver cancer cohorts

Figure S4. Mutation burden statistics in two liver cancer cohorts.

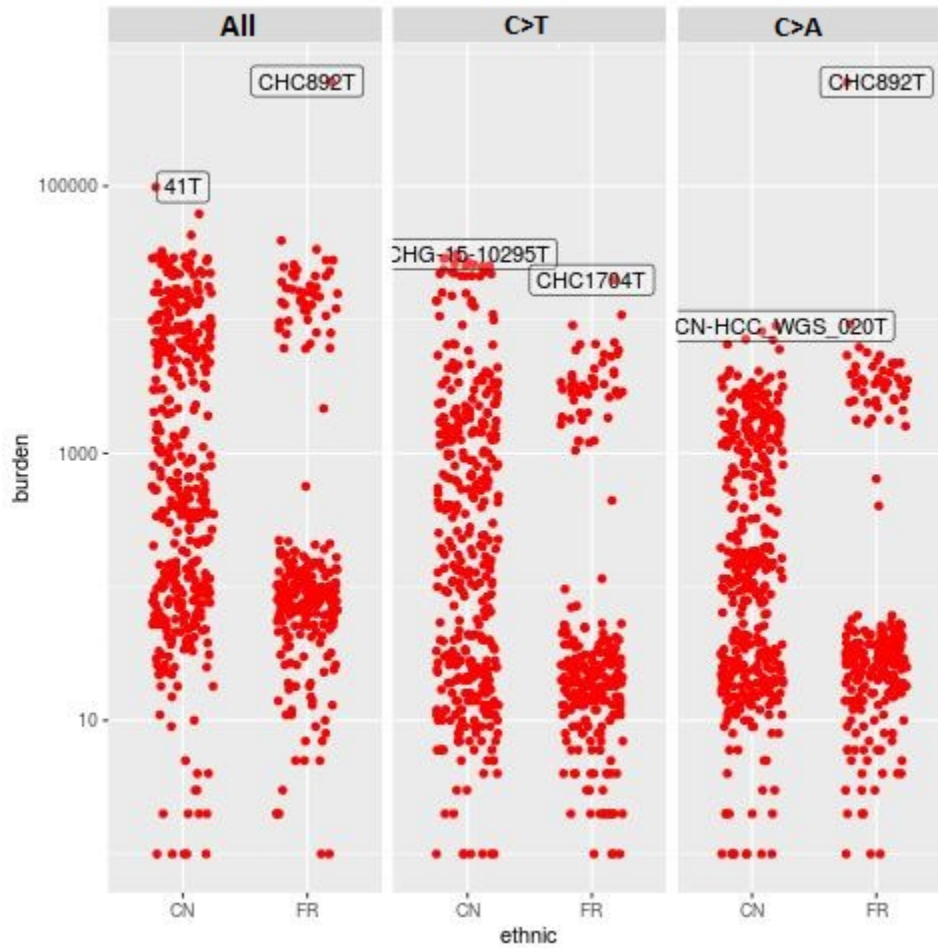

The single patients of the highest mutation burden in each perspective were identified with the patient code in the respective cohort. CN, LICA-CN; FR, LICA-FR.

Table S1. Population-specific liver cancer cohorts and mutation statistics

|               | Cohort | #patients | #mutations* | Median burden | Maximum burden |
|---------------|--------|-----------|-------------|---------------|----------------|
| All mutations | CN     | 400       | 1,983,143   | 537           | 98,093         |
|               | FR     | 254       | 1,369,678   | 91            | 609,503        |
| C>A           | CN     | 390       | 888,142     | 173           | 30,924         |
|               | FR     | 250       | 193,505     | 21            | 19,897         |
| C>T           | CN     | 396       | 284,314     | 119           | 8,998          |
|               | FR     | 250       | 770,613     | 30            | 597,946        |

\*Number of unique mutation observed in the whole cohort.

Figure S5. Imbalance between C>A and G>T mutation forms in LICA-CN

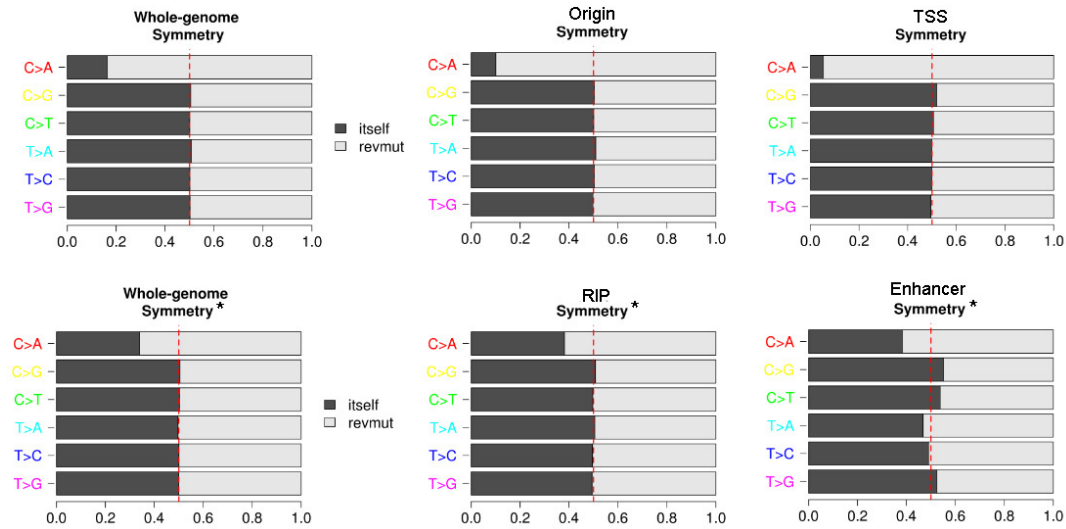

\* The bottom three plots were based on a trimmed cohort with 40 hyper-mutated patients excluded (the top three plots used the whole cohort).

## Comparison of mutation density between RIP and Origin

Figure S6. RIP shows higher mutation density than Origin in LMS-FR

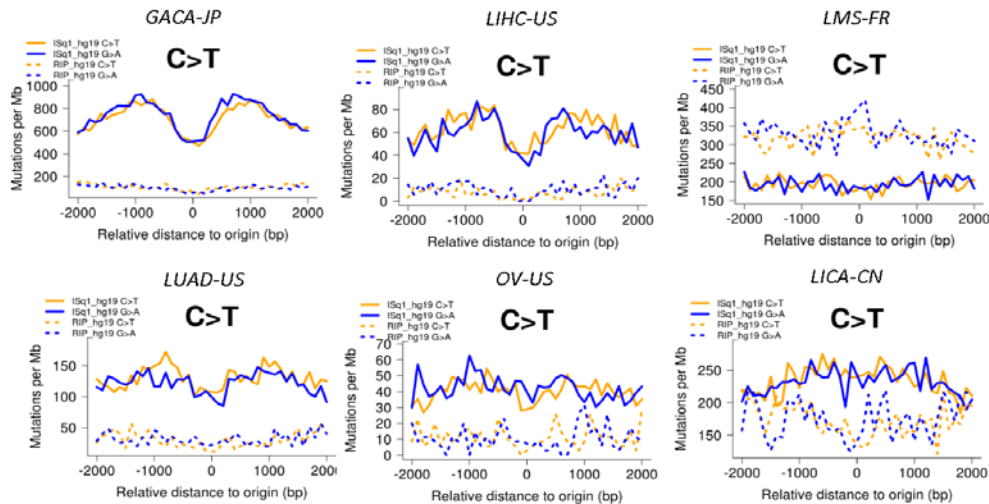

## Melanoma C>T transcriptional strand bias revealed in random subsets of samples

Figure S7. Transcriptional strand bias was revealed in ten random MELA-AU patients. Random selection of ten patients was repeated five times.

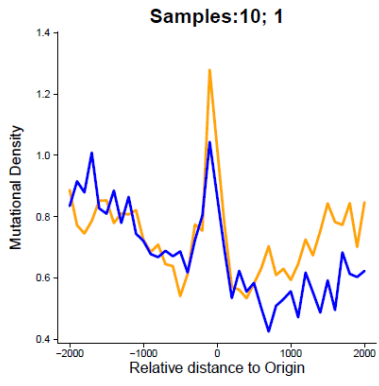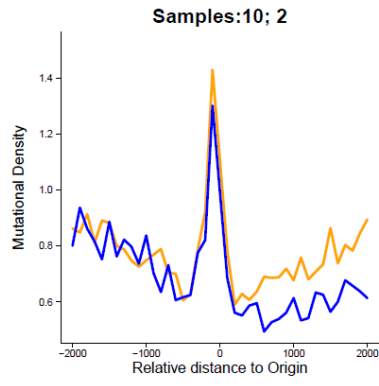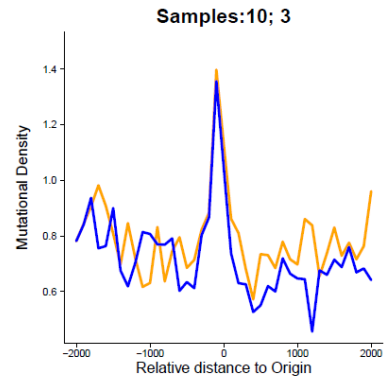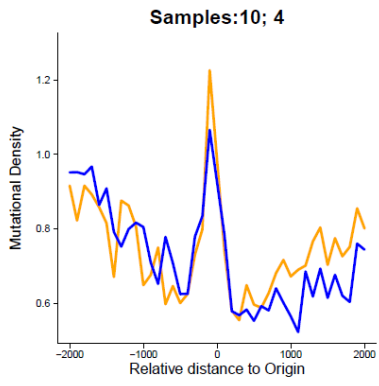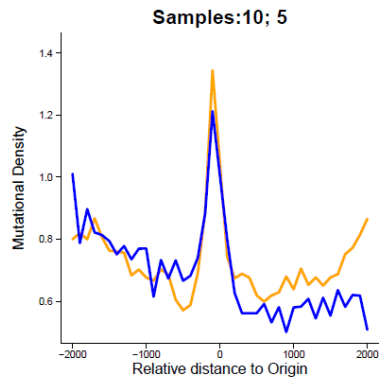

Figure S8. Transcriptional strand bias was blurry in random single MELA-AU patients  
Random selection of a single patients was repeated five times.

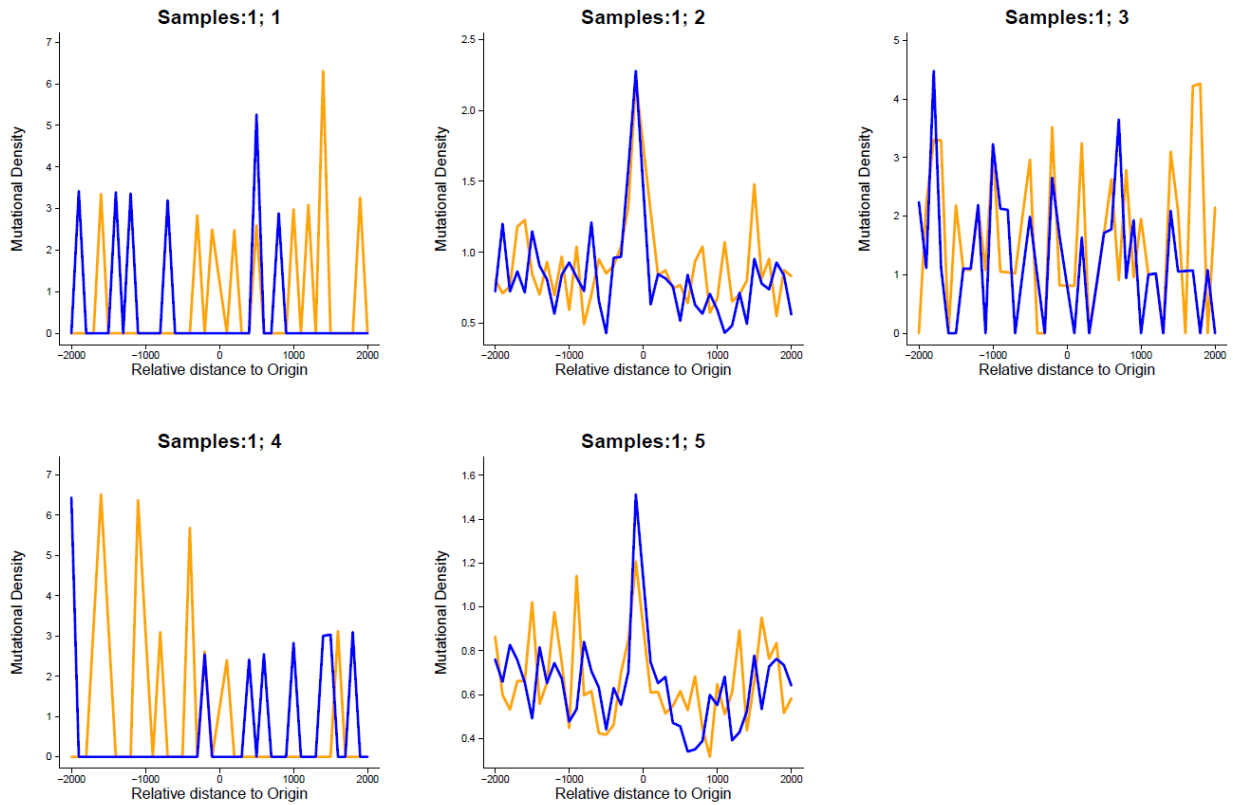

## Runtime analysis of MutDens

Figure S9. MutDens computational time scales linearly with position/mutation quantity  
Sessions were tested on a Linux Ubuntu work station with Intel Xeon CUP E5-2650 V4 @ 2.20GHz and 32 GB memory.



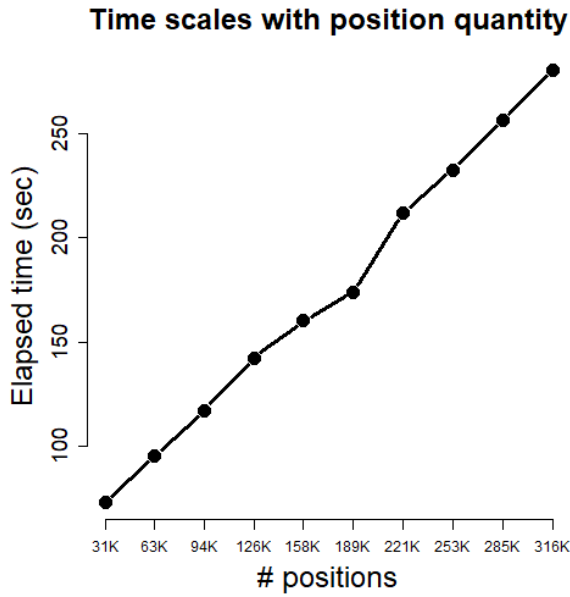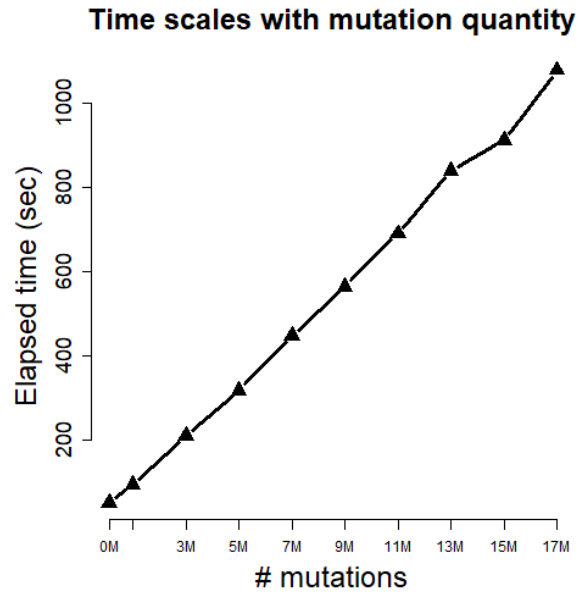

## Option configuration file samples

Each option file must be tab-delimited. The following shows the contents for three option files: options\_1reg.txt, options\_2cht.txt, and options\_2reg.txt. These three option files are required by Supplemental\_Code\_S3.txt, Supplemental\_Code\_S4.txt, and Supplemental\_Code\_S5.txt, respectively. For more related files (data files, example output, option explanation, etc.), please refer to <https://github.com/hui-sheen/MutDens>

### Supplemental\_Code\_S6 (options\_1reg.txt)

| Key        | Value                      |
|------------|----------------------------|
| bsz        | 100                        |
| calcSrc    | NULL                       |
| gFt        | TSS                        |
| gn         | hg19                       |
| inspan     | 2000                       |
| mutF       | mutFiles/LICA-FR.off10.tsv |
| outerspan  | 7000                       |
| pointsF    | data/proTSS_hg19.tsv       |
| sbs        | SBS6                       |
| shapeModel | pois                       |

span 2000

triCont FALSE

### [Supplemental\\_Code\\_S7 \(options\\_2cht.txt\)](#)

Key Value

bsz 100

calcSrc NULL

gFt TSS

gn hg19

inspan 2000

mutF1 mutFiles/LICA-CN.off10.tsv

mutF2 mutFiles/LICA-FR.off10.tsv

outerspan 7000

pointsF data/proTSS\_hg19.tsv

sbs SBS6

shapeModel pois

span 2000

triCont FALSE

### [Supplemental\\_Code\\_S8 \(options\\_2reg.txt\)](#)

Key Value

bsz 100

calcSrc NULL

gFt1 ISq1

gFt2 eRNA

gn hg19

inspan 2000

mutF mutFiles/LICA-CN.off10.tsv

outerspan 7000

points1F data/ISq1\_hg19.tsv

points2F data/eRNA\_hg19.tsv

sbs SBS6  
shapeModel pois  
span 2000  
triCont FALSE
